# Supplementary material
Source: MDPI journal article supplement (https://www.mdpi.com/2073-4352/12/12/1793)
Supplement: s1 [file s1]

## Supplementary Material

# Wet Synthesis of Graphene-Polypyrrole Nanocomposites via Graphite Intercalation Compounds

Gintare Rimkute <sup>1</sup>, Gediminas Niaura <sup>2</sup>, Rasa Pauliukaite <sup>3</sup>, Justina Gaidukevic <sup>1</sup>, and Jurgis Barkauskas <sup>1,\*</sup>

<sup>1</sup> Institute of Chemistry, Faculty of Chemistry and Geosciences, Vilnius University, Naugarduko Str. 24, LT-03225 Vilnius, Lithuania; justina.gaidukevic@chf.vu.lt (J.G.)

<sup>2</sup> Department of Organic Chemistry, Center for Physical Sciences and Technology (FTMC), Sauletekio Ave. 3, LT-10257 Vilnius, Lithuania; gediminas.niaura@ftmc.lt (G.N.)

<sup>3</sup> Department of Nanoengineering, Center for Physical Sciences and Technology, Savanoriu Ave. 231, Vilnius LT-02300, Lithuania; rasa.pauliukaite@ftmc.lt (R.P.)

\* Correspondence: jurgis.barkauskas@chf.vu.lt (J.B.);

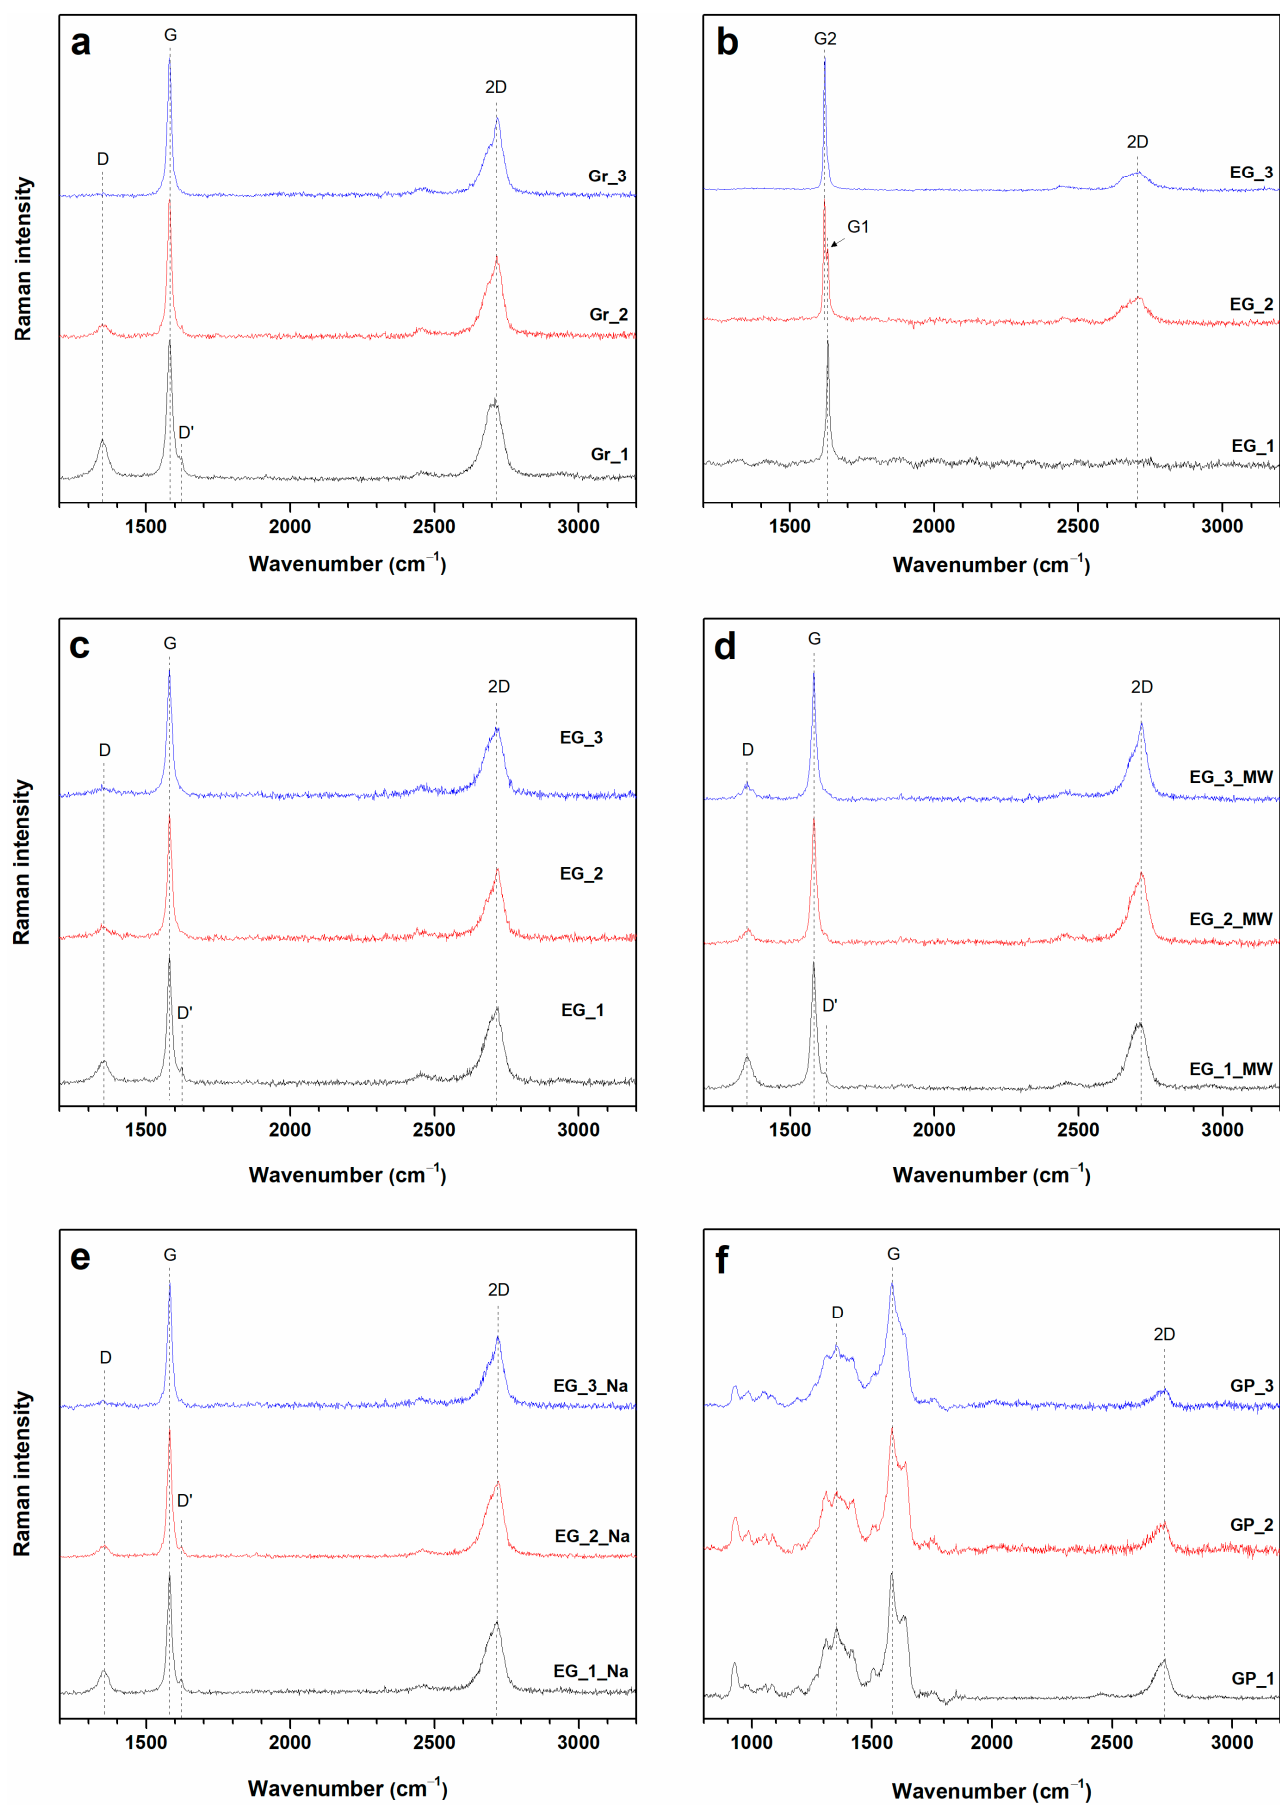

**Figure S1.** Raman spectra of graphite (a); GBS products (b), EG products (c), EG\_MW products (d), EG\_Na products (e), and EG samples modified with PPy (f).

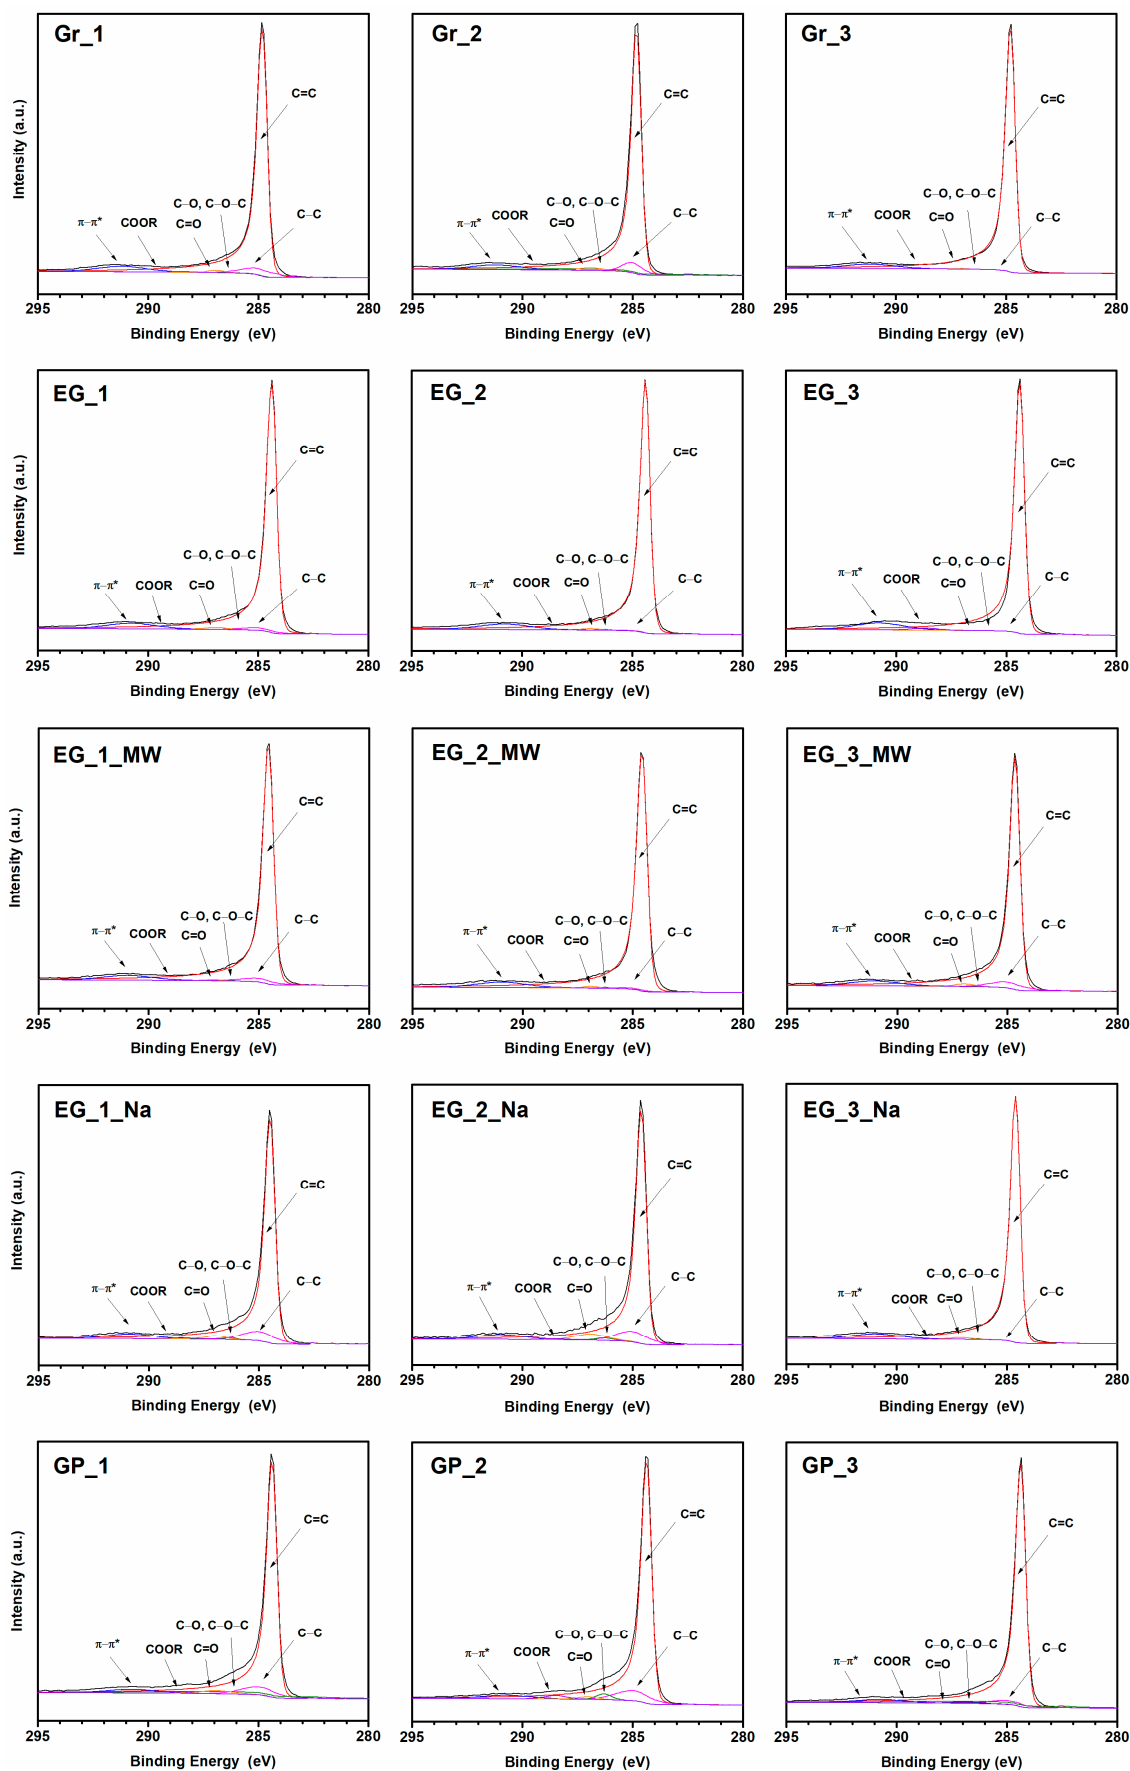

**Figure S2.** C 1s XPS spectra of pristine graphite, EG, and nanocomposite GP samples.

Spectra of all analysed samples are fitted into six components. The most intense peak at around 284.4 eV is assigned to the  $sp^2$  carbon (C=C) of the graphene lattices. The peak at about 285.0 eV is related to  $sp^3$  carbon (C–C). The C–O and C–O–C groups show a relevant binding energy at about 286.0 eV. The corresponding signals of C=O groups are located at around 287.0 eV, while COOR groups are located at around 288.5 eV. The peak at approximately 291.0 eV – 292.0 eV is the satellite of the  $sp^2$  bonds due to  $\pi$ - $\pi^*$  shake-up.

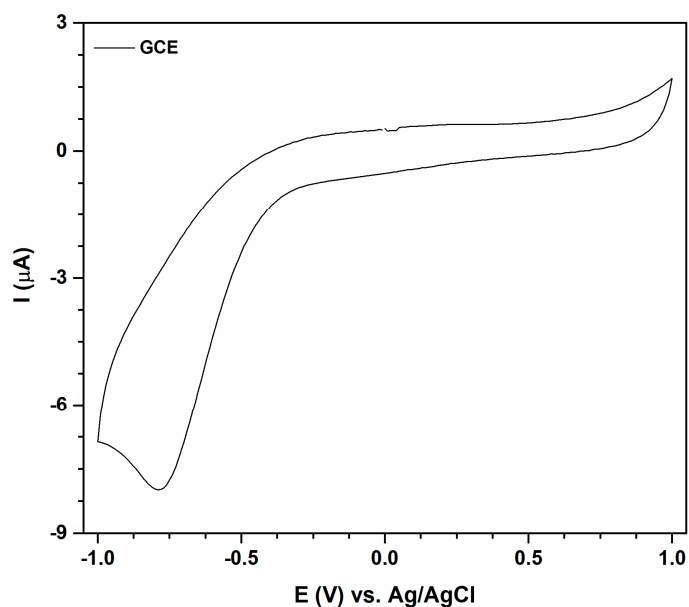

**Figure S3.** CV at bare GCE.
